# Supplementary material
Source: PubMed Central journal article supplement (PMC2997898)
Supplement: NIHMS235258-supplement-01.pdf [file NIHMS235258-supplement-01.pdf]

**Table S1.** Iron-responsive proteins in *A. baumannii* ATCC 19606<sup>T</sup> identified via PMF.

| Spot <sup>a</sup>                        | ASQ <sup>b</sup> |                                                                                                     |             |              | Protein function/name <sup>c</sup><br><i>Source is italicized</i> | Gene <sup>c</sup> | NCBI<br>Accession # | Theoretical <sup>d</sup> |    | S <sup>e</sup> | M <sup>f</sup> | C <sup>g</sup> | F <sup>h</sup> |
|------------------------------------------|------------------|-----------------------------------------------------------------------------------------------------|-------------|--------------|-------------------------------------------------------------------|-------------------|---------------------|--------------------------|----|----------------|----------------|----------------|----------------|
|                                          | A                | B                                                                                                   | C           | D            |                                                                   |                   |                     | M <sub>r</sub>           | pI |                |                |                |                |
| <b><i>Iron acquisition/Virulence</i></b> |                  |                                                                                                     |             |              |                                                                   |                   |                     |                          |    |                |                |                |                |
| 22                                       |                  | Outer membrane receptor for ferrienterochelin and colicins<br><i>A. baumannii</i> ACICU             | <i>fepA</i> | gi 184157262 | 82767                                                             | 5.66              | 172                 | 26                       | 39 | TC             |                |                |                |
| 27                                       |                  | Ferric aerobactin receptor protein<br><i>A. baumannii</i> ATCC 19606 <sup>T</sup>                   |             | gi 260555123 | 85609                                                             | 7.55              | 346                 | 42                       | 74 | TC             |                |                |                |
| 31                                       |                  | Ferric anguibactin receptor<br><i>A. baumannii</i> ATCC 19606 <sup>T</sup>                          | <i>bauA</i> | gi 260556700 | 82960                                                             | 5.86              | 288                 | 28                       | 54 | TC             |                |                |                |
| 33                                       |                  | Ferric aerobactin receptor protein<br><i>A. baumannii</i> ATCC 19606 <sup>T</sup>                   |             | gi 260555123 | 85609                                                             | 7.55              | 138                 | 25                       | 38 | OM             |                |                |                |
| 37                                       |                  | Ferric enterobactin receptor precursor<br><i>A. baumannii</i> AYE                                   | <i>fepA</i> | gi 169796822 | 82746                                                             | 5.66              | 146                 | 23                       | 42 | OM             |                |                |                |
| 39                                       |                  | TonB-dependent vitamin B12 receptor<br><i>A. baumannii</i> ATCC 19606 <sup>T</sup>                  | <i>btuB</i> | gi 260557148 | 68121                                                             | 5.22              | 277                 | 28                       | 57 | OM             |                |                |                |
| 45                                       |                  | FhuE receptor<br><i>A. baumannii</i> ATCC 19606 <sup>T</sup>                                        | <i>fhuE</i> | gi 260555105 | 80612                                                             | 5.44              | 98                  | 10                       | 14 | OM             |                |                |                |
| 46                                       |                  | FhuE receptor<br><i>A. baumannii</i> ATCC 19606 <sup>T</sup>                                        | <i>fhuE</i> | gi 260555105 | 80612                                                             | 5.44              | 226                 | 25                       | 42 | OM             |                |                |                |
| 47                                       |                  | Ferric anguibactin receptor<br><i>A. baumannii</i> ATCC 19606 <sup>T</sup>                          | <i>bauA</i> | gi 260556700 | 82960                                                             | 5.86              | 242                 | 31                       | 48 | OM             |                |                |                |
| 48                                       |                  | Outer membrane receptor protein, mostly Fe transport<br><i>A. baumannii</i> ATCC 19606 <sup>T</sup> |             | gi 260557370 | 78171                                                             | 5.47              | 339                 | 33                       | 58 | OM             |                |                |                |
| 49                                       |                  | Ferric enterobactin receptor precursor<br><i>A. baumannii</i> AYE                                   | <i>fepA</i> | gi 169796822 | 82746                                                             | 5.66              | 113                 | 19                       | 28 | OM             |                |                |                |
| 53                                       |                  | Ferric aerobactin receptor protein<br><i>A. baumannii</i> ATCC 19606 <sup>T</sup>                   |             | gi 260555123 | 85609                                                             | 7.55              | 356                 | 39                       | 68 | OM             |                |                |                |
| 54                                       |                  | Outer membrane receptor for ferrienterochelin and colicins<br><i>A. baumannii</i> ACICU             | <i>fepA</i> | gi 184157262 | 82767                                                             | 5.66              | 186                 | 28                       | 46 | OM             |                |                |                |
| 55                                       |                  | Ferric aerobactin receptor protein<br><i>A. baumannii</i> ATCC 19606 <sup>T</sup>                   |             | gi 260555123 | 85609                                                             | 7.55              | 405                 | 48                       | 73 | OM             |                |                |                |
| 57                                       |                  | Ferric anguibactin receptor<br><i>A. baumannii</i> ATCC 19606 <sup>T</sup>                          | <i>bauA</i> | gi 260555123 | 85609                                                             | 7.55              | 343                 | 33                       | 62 | OM             |                |                |                |
| <b><i>Porins</i></b>                     |                  |                                                                                                     |             |              |                                                                   |                   |                     |                          |    |                |                |                |                |
| 32                                       |                  | Putative outer membrane protein W<br><i>A. baumannii</i> ATCC 19606 <sup>T</sup>                    | <i>ompW</i> | gi 260556338 | 23137                                                             | 6.29              | 93                  | 8                        | 57 | OM             |                |                |                |

|                                    |                                                                                     |                                                                                            |                           |       |      |     |    |    |    |
|------------------------------------|-------------------------------------------------------------------------------------|--------------------------------------------------------------------------------------------|---------------------------|-------|------|-----|----|----|----|
| 34                                 | 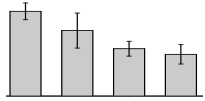    | Putative outer membrane protein<br><i>A. baumannii</i> ATCC 17978                          | gi 126640934              | 22471 | 9.30 | 93  | 11 | 53 | OM |
| 35                                 |    | Carbapenem-associated resistance protein<br><i>A. baumannii</i> ATCC 19606 <sup>T</sup>    | <i>carO</i> gi 260556565  | 26855 | 4.66 | 133 | 12 | 76 | OM |
| 43                                 |    | Putative outer membrane protein W<br><i>A. baumannii</i> ATCC 19606 <sup>T</sup>           | <i>ompW</i> gi 260556338  | 23137 | 6.29 | 83  | 8  | 57 | OM |
| 44                                 |    | Outer membrane protein A<br><i>A. baumannii</i>                                            | <i>ompA</i> gi 129307154  | 36939 | 5.42 | 109 | 12 | 37 | OM |
| 56                                 |    | Outer membrane protein Omp38<br><i>A. baumannii</i> ATCC 19606 <sup>T</sup>                | <i>omp38</i> gi 260557183 | 38397 | 5.32 | 86  | 7  | 20 | OM |
| 58                                 |    | Outer membrane protein Omp38<br><i>Acinetobacter</i> sp. RUH2624                           | <i>omp38</i> gi 260548855 | 37972 | 5.72 | 139 | 15 | 39 | OM |
| <b>Adaptation/Stress tolerance</b> |                                                                                     |                                                                                            |                           |       |      |     |    |    |    |
| 5                                  |    | Chaperonin GroEL<br><i>A. baumannii</i> SDF                                                | <i>groEL</i> gi 169632653 | 56886 | 4.92 | 273 | 34 | 55 | TC |
| 8                                  |    | Superoxide dismutase (Fe)<br><i>A. baumannii</i> SDF                                       | <i>sodB</i> gi 169632935  | 22905 | 5.56 | 123 | 6  | 41 | TC |
| 9                                  |   | Bacterioferritin<br><i>A. baumannii</i> ATCC 17978                                         | <i>bfr</i> gi 126640856   | 18023 | 5.02 | 137 | 17 | 70 | TC |
| 10                                 |  | Superoxide dismutase (Fe)<br><i>A. baumannii</i> SDF                                       | <i>sodB</i> gi 169632935  | 22905 | 5.56 | 109 | 8  | 44 | TC |
| 24                                 |  | Superoxide dismutase (Fe)<br><i>A. baumannii</i> SDF                                       | <i>sodB</i> gi 169632935  | 22905 | 5.56 | 83  | 8  | 44 | TC |
| 26                                 |  | Fumarase C<br>(fumarate hydratase class II)<br><i>A. baumannii</i> ATCC 19606 <sup>T</sup> | <i>fumC</i> gi 260554730  | 50111 | 5.74 | 128 | 17 | 39 | TC |
| 38                                 |  | Bacterioferritin<br><i>A. baumannii</i> ATCC 19606 <sup>T</sup>                            | <i>bfr</i> gi 260410611   | 18137 | 5.02 | 106 | 14 | 72 | OM |
| 41                                 |  | Bacterioferritin<br><i>A. baumannii</i> ATCC 19606 <sup>T</sup>                            | <i>bfr</i> gi 260410611   | 18137 | 5.02 | 78  | 9  | 45 | OM |
| 42                                 |  | Bacterioferritin<br><i>A. baumannii</i> ATCC 19606 <sup>T</sup>                            | <i>bfr</i> gi 260410611   | 18137 | 5.02 | 100 | 12 | 66 | OM |
| <b>TCA cycle</b>                   |                                                                                     |                                                                                            |                           |       |      |     |    |    |    |
| 14                                 |  | Succinate dehydrogenase<br>flavoprotein subunit<br><i>A. baumannii</i> ATCC 17978          | <i>sdh</i> gi 126642744   | 64049 | 6.07 | 92  | 6  | 18 | TC |
| 15                                 |  | Aconitate hydratase 2<br><i>A. baumannii</i> ATCC 19606 <sup>T</sup>                       | <i>acnB</i> gi 260411150  | 95322 | 5.07 | 238 | 37 | 48 | TC |
| 19                                 |  | Fumarate hydratase<br><i>A. baumannii</i> ATCC 17978                                       | <i>fumA</i> gi 193076292  | 54948 | 5.44 | 129 | 18 | 49 | TC |

|                           |                                                                                     |                                                                                                       |             |              |        |      |     |    |    |    |
|---------------------------|-------------------------------------------------------------------------------------|-------------------------------------------------------------------------------------------------------|-------------|--------------|--------|------|-----|----|----|----|
| 20                        | 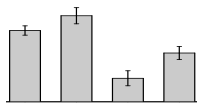    | Aconitate hydratase 2<br><i>A. baumannii</i> ATCC 19606 <sup>T</sup>                                  | <i>acnB</i> | gi 260411150 | 95322  | 5.07 | 136 | 24 | 32 | TC |
| 21                        |    | Aconitate hydratase 1<br><i>A. baumannii</i> ATCC 19606 <sup>T</sup>                                  | <i>acnA</i> | gi 260556094 | 100503 | 5.28 | 410 | 36 | 44 | TC |
| 30                        |    | Succinate dehydrogenase<br>flavoprotein subunit<br><i>A. baumannii</i> ATCC 17978                     | <i>sdh</i>  | gi 126642744 | 64049  | 6.07 | 169 | 21 | 46 | TC |
| <b>Lipid Metabolism</b>   |                                                                                     |                                                                                                       |             |              |        |      |     |    |    |    |
| 3                         |    | Beta-ketoacyl-CoA thiolase<br><i>A. baumannii</i> ATCC 19606 <sup>T</sup>                             | <i>pcaF</i> | gi 260555473 | 43107  | 5.96 | 138 | 20 | 54 | TC |
| 18                        |    | Acyl-CoA dehydrogenase<br><i>A. baumannii</i> ATCC 19606 <sup>T</sup>                                 |             | gi 260554863 | 42780  | 5.30 | 185 | 26 | 46 | TC |
| 25                        |    | 2-ketocyclohexanecarboxyl-CoA<br>hydrolase<br><i>A. baumannii</i> ATCC 19606 <sup>T</sup>             |             | gi 260555475 | 29342  | 5.75 | 231 | 27 | 76 | TC |
| 29                        |    | 2-hydroxycyclohexanecarboxyl-<br>CoA dehydrogenase<br><i>A. baumannii</i> ATCC 19606 <sup>T</sup>     | <i>fabG</i> | gi 260555032 | 27802  | 5.96 | 100 | 10 | 50 | TC |
| <b>Regulatory</b>         |                                                                                     |                                                                                                       |             |              |        |      |     |    |    |    |
| 2                         |    | Host factor I for bacteriophage<br>Q beta replication hfq<br><i>A. baumannii</i> AYE                  | <i>hfq</i>  | gi 169795564 | 16751  | 6.82 | 91  | 8  | 39 | TC |
| 50                        |   | 30S ribosomal protein S6<br><i>A. baumannii</i> SDF                                                   | <i>rpsF</i> | gi 169633238 | 14954  | 5.70 | 93  | 10 | 61 | OM |
| 51                        |  | 50S ribosomal protein L3<br><i>A. baumannii</i> AYE                                                   | <i>rplC</i> | gi 169794594 | 22523  | 9.87 | 108 | 10 | 63 | OM |
| 52                        |  | Peptidyl-prolyl cis-trans isomerase<br><i>A. baumannii</i> ATCC 17978                                 | <i>surA</i> | gi 126641590 | 46526  | 5.75 | 197 | 19 | 47 | OM |
| <b>Energy/Metabolisms</b> |                                                                                     |                                                                                                       |             |              |        |      |     |    |    |    |
| 1                         |  | Phenylacetate-CoA oxygenase<br>subunit PaaB<br><i>A. baumannii</i> ATCC 17978                         | <i>paaB</i> | gi 126641383 | 11317  | 6.04 | 176 | 15 | 86 | TC |
| 4                         |  | Serine hydroxymethyltransferase<br><i>A. baumannii</i> AYE                                            | <i>glyA</i> | gi 169795307 | 44967  | 5.44 | 107 | 11 | 36 | TC |
| 11                        |  | Putative flavohemoprotein<br>(hemoglobin-like protein)<br><i>A. baumannii</i> ATCC 19606 <sup>T</sup> |             | gi 260409628 | 28814  | 4.91 | 188 | 15 | 60 | TC |
| 12                        |  | Phenylacetate-CoA oxygenase/<br>reductase PaaK subunit<br><i>A. baumannii</i> ATCC 17978              | <i>paaK</i> | gi 193077015 | 39763  | 5.03 | 195 | 25 | 63 | TC |
| 16                        |  | Benzoate 1,2-dioxygenase,<br>small subunit<br><i>A. baumannii</i> ATCC 19606 <sup>T</sup>             |             | gi 260554867 | 18965  | 5.22 | 93  | 6  | 30 | TC |
| 28                        |  | Phenylacetate-CoA oxygenase<br>subunit PaaB<br><i>A. baumannii</i> ATCC 17978                         | <i>paaB</i> | gi 126641383 | 11317  | 6.04 | 196 | 16 | 91 | TC |

|    |                                                                                   |                                                                            |             |              |       |      |     |    |    |    |
|----|-----------------------------------------------------------------------------------|----------------------------------------------------------------------------|-------------|--------------|-------|------|-----|----|----|----|
| 36 | 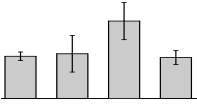  | F0F1 ATP synthase subunit alpha<br><i>A. baumannii</i> ATCC 17978          | <i>atpA</i> | gi 162286757 | 55363 | 5.29 | 207 | 25 | 45 | OM |
|    |                                                                                   | <b>Unknown</b>                                                             |             |              |       |      |     |    |    |    |
| 6  |  | Putative 17-kDa surface antigen<br><i>A. baumannii</i> ACICU               |             | gi 184157742 | 12424 | 4.70 | 87  | 8  | 83 | TC |
| 7  |  | Signal peptide ydeN<br><i>A. baumannii</i> ATCC 19606 <sup>T</sup>         | <i>ydeN</i> | gi 260556330 | 22987 | 4.75 | 92  | 7  | 34 | TC |
| 13 |  | Hypothetical protein A1S_1295<br><i>A. baumannii</i> ATCC 17978            |             | gi 193076983 | 55265 | 5.07 | 129 | 17 | 39 | TC |
| 17 |  | Short chain dehydrogenase<br><i>A. baumannii</i> SDF                       |             | gi 169632063 | 26998 | 5.18 | 135 | 14 | 55 | TC |
| 23 |  | Hemerythrin HHE cation binding domain protein<br><i>A. baumannii</i> AB900 |             | gi 239501928 | 17516 | 5.68 | 88  | 9  | 53 | TC |
| 40 |  | Hypothetical protein A1S_1295<br><i>A. baumannii</i> ATCC 17978            |             | gi 193076983 | 55265 | 5.07 | 149 | 20 | 49 | OM |

<sup>a</sup>The spot numbers correspond to the numbers given in Figures 2, 3 and 4.

<sup>b</sup>Average spot quantity per treatment group (n = 3); columns A, <sup>-</sup>Fe/<sup>-</sup>DIP; B, <sup>+</sup>Fe/<sup>-</sup>DIP; C, <sup>-</sup>Fe/<sup>+</sup>DIP; D, <sup>+</sup>Fe/<sup>+</sup>DIP.

<sup>c</sup>Protein function, name and gene were determined by <http://www.ncbi.nlm.nih.gov/BLAST/>.

<sup>d</sup>Theoretical molecular mass ( $M_r$ ) and isoelectric point (pI) were calculated by <http://www.expasy.org/>.

<sup>e</sup>Mascot score.

<sup>f</sup>Number of matched peptide masses.

<sup>g</sup>Percent sequence coverage.

<sup>h</sup>Protein fraction, total cell (TC) or Outer membrane-enriched (OM) protein extracts.
